# Supplementary material
Source: PubMed Central journal article supplement (PMC3340284)
Supplement: supp_M111.257436_jbc.M111.257436-1.pdf [file supp_M111.257436_jbc.M111.257436-1.pdf]

## SUPPLEMENTAL DATA

## COORDINATE TRANSFORMATION FOR FORCE CALCULATIONS

$\beta$  defines an internal coordinate system along the backbone of a protein based on relative positions of three contiguous  $C_\alpha$  (refer to Fig. 2), where by the law of cosines:

$$\beta = \arccos \frac{|\vec{R}_{12}|^2 + |\vec{R}_{23}|^2 - |\vec{R}_{13}|^2}{2|\vec{R}_{12}||\vec{R}_{23}|} \quad (2)$$

$$\text{Let } B = \frac{|\vec{R}_{12}|^2 + |\vec{R}_{23}|^2 - |\vec{R}_{13}|^2}{2|\vec{R}_{12}||\vec{R}_{23}|} \Rightarrow \beta = \arccos B \quad (3)$$

With respect to the figure, we're interested in the force on on  $C_{\alpha 2}$ . From the chain rule we can introduce the coordinate  $\beta$  from eqs. 2 and 3:

$$\vec{F}_2 = -\frac{\partial U}{\partial \beta} \hat{r}|_{\vec{r}=\vec{r}_2} = -\frac{\partial U}{\partial \vec{r}_2} \cdot \frac{\partial \vec{r}_2}{\partial \beta} \hat{r} = -\left( \frac{\partial U}{\partial x_2} \frac{\partial x_2}{\partial \beta} \hat{i} + \frac{\partial U}{\partial y_2} \frac{\partial y_2}{\partial \beta} \hat{j} + \frac{\partial U}{\partial z_2} \frac{\partial z_2}{\partial \beta} \hat{k} \right) \quad (4)$$

The  $-\partial U/\partial \vec{r}_2$  term is solved by CHARMM in terms of Cartesian coordinates. The  $\partial r_2/\partial \beta$  term is one that must be evaluated in terms of Cartesian coordinates, where  $\partial \vec{r}_2/\partial \beta = 1/(\partial \beta/\partial \vec{r}_2)$ . To evaluate  $\partial \beta/\partial \vec{r}_2$ , where  $\beta = \arccos f(x_i, y_i, z_i)$  and  $i = 1, 2, 3$ , we see from derivative tables:

$$\frac{d \arccos f(x)}{dx} = -\frac{1}{\sqrt{1-f(x)^2}} \frac{df(x)}{dx} \Rightarrow \frac{\partial \beta}{\partial \vec{r}_2} = -\frac{1}{\sqrt{1-B^2}} \frac{\partial B}{\partial \vec{r}_2} \quad (5)$$

In order to evaluate  $\partial \beta/\partial \vec{r}_2$ , we will let:

$$f(\vec{r}) = |\vec{R}_{12}|^2 + |\vec{R}_{23}|^2 - |\vec{R}_{13}|^2 \text{ and } g(\vec{r}) = 2|\vec{R}_{12}||\vec{R}_{23}| \Rightarrow B = \frac{f(\vec{r})}{g(\vec{r})} \quad (6)$$

We first evaluate  $\partial f(\vec{r})/\partial \vec{r}_2$ :

$$\frac{\partial f(\vec{r})}{\partial x_2} = 2(2x_2 - x_1 - x_3)\hat{i}, \quad \frac{\partial f(\vec{r})}{\partial y_2} = 2(2y_2 - y_1 - y_3)\hat{j}, \quad \frac{\partial f(\vec{r})}{\partial z_2} = 2(2z_2 - z_1 - z_3)\hat{k} \quad (7)$$

Then evaluate  $\partial g(\vec{r})/\partial \vec{r}_2$ :

$$\begin{aligned} \frac{\partial g(\vec{r})}{\partial x_2} &= 2(|\vec{R}_{12}| \frac{1}{2}[2(x_2 - x_3)(1)] + |\vec{R}_{23}| \frac{1}{2}[2(x_1 - x_2)(-1)]) = [2(x_2 - x_3)|\vec{R}_{12}| - (x_1 - x_2)|\vec{R}_{23}|]\hat{i} \\ \frac{\partial g(\vec{r})}{\partial y_2} &= [2(y_2 - y_3)|\vec{R}_{12}| - (y_1 - y_2)|\vec{R}_{23}|]\hat{j} \\ \frac{\partial g(\vec{r})}{\partial z_2} &= [2(z_2 - z_3)|\vec{R}_{12}| - (z_1 - z_2)|\vec{R}_{23}|]\hat{k} \end{aligned} \quad (8)$$

Together, we can evaluate  $\partial \vec{r}_2/\partial \beta$ :

$$\frac{\partial \beta}{\partial x_2} = -\frac{1}{\sqrt{1-B^2}} \frac{g(\vec{r}) \frac{\partial f(\vec{r})}{\partial x_2} - f(\vec{r}) \frac{\partial g(\vec{r})}{\partial x_2}}{g(\vec{r})^2} \Rightarrow \frac{\partial x_2}{\partial \beta} = -\sqrt{1-B^2} \frac{g(\vec{r})^2}{g(\vec{r}) \frac{\partial f(\vec{r})}{\partial x_2} - f(\vec{r}) \frac{\partial g(\vec{r})}{\partial x_2}} \quad (9)$$

with similar expressions for  $y_2$  and  $z_2$ . Therefore,

$$\vec{F}_2 = g(\vec{r})^2 \sqrt{1 - B^2} \left( \begin{aligned} & \left( \frac{\partial U}{\partial x_2} \frac{1}{g(\vec{r}) \frac{\partial f(\vec{r})}{\partial x_2} - f(\vec{r}) \frac{\partial g(\vec{r})}{\partial x_2}} \hat{i} \right. \\ & \quad + \frac{\partial U}{\partial y_2} \frac{1}{g(\vec{r}) \frac{\partial f(\vec{r})}{\partial y_2} - f(\vec{r}) \frac{\partial g(\vec{r})}{\partial y_2}} \hat{j} \\ & \quad \left. + \frac{\partial U}{\partial z_2} \frac{1}{g(\vec{r}) \frac{\partial f(\vec{r})}{\partial z_2} - f(\vec{r}) \frac{\partial g(\vec{r})}{\partial z_2}} \hat{k} \right) \end{aligned} \right) \quad (10)$$

This gives an expression of the force on  $C_{\alpha 2}$  in terms of a coordinate system defined by three adjoining  $C_{\alpha}$ 's and an angle  $\beta$ , which can be explicitly described in terms of Cartesian coordinates. This should allow us to use CHARMM's output to express this force as a function of an intrinsically defined coordinate system.
